1 **Estimation of Global and Local Complexities of Brain Networks: A**  
2 **Random Walks Approach**

3

4 Roberto C. Sotero<sup>1,2,3\*</sup>, Lazaro M. Sanchez-Rodriguez<sup>1,2</sup>, Narges Moradi<sup>1,2,3</sup>

5

6 <sup>1</sup>Hotchkiss Brain Institute, University of Calgary, AB, Canada

7 <sup>2</sup>Department of Radiology, University of Calgary, AB, Canada

8 <sup>3</sup>Biomedical Engineering Graduate Program, University of Calgary, AB, Canada

9

10 \*Correspondence: [roberto.soterodiaz@ucalgary.ca](mailto:roberto.soterodiaz@ucalgary.ca)

11

12

13

14

15

16

17

18

19

20

21

22

23

24 **Abstract**

25 The complexity of brain activity has been observed at many spatial scales and there exists  
26 increasing evidence supporting its use in differentiating between mental states and disorders.  
27 Here we proposed a new measure of network (global) complexity that is constructed as the sum  
28 of the complexities of its nodes (i.e, local complexity). The local complexity of each node is  
29 regarded as an index that compares the sample entropy of the time series generated by the  
30 movement of a random walker on the network resulting from removing the node and its  
31 connections, with the sample entropy of the time series obtained from a regular lattice (the  
32 ordered state) and an Erdős-Renyi network (disordered state). We studied the complexity of  
33 fMRI-based resting-state functional networks. We found that positively correlated, or “**pos**”,  
34 network comprising only the positive functional connections has higher complexity than the  
35 anticorrelation (“**neg**”) network (comprising the negative functional connections) and the  
36 network consisting of the absolute value of all connections (“**abs**”). We also found a significant  
37 correlation between complexity and the strength of functional connectivity. For the **pos** network  
38 this correlation is significantly weaker at the local scale compared to the global scale, whereas  
39 for the **neg** network the link is stronger at the local scale than at the global scale, but still weaker  
40 than for the **pos** network. Our results suggest that the **pos** network is related to the information  
41 processing in the brain and should be used for functional connectivity analysis instead of the **abs**  
42 network as is usually done.

43

44

45

46

47

## 48 **1. Introduction**

49       The development of a quantitative measure of complexity has proven difficult because of  
50 the variety of systems that may be labelled as ‘complex’. In the case of the complexity of  
51 networks, perhaps the most popular approach has been the use of information-based measures  
52 (Bonchev & Buck, 2005; Dehmer, Barbarini, Varmuza, & Graber, 2009). The basic principle to  
53 construct these measures is to select an arbitrary graph invariant  $X$ , partitioned as  $X_1, \dots, X_N$ .  
54 Probabilities can be inferred for each partition using the entities  $p_i = X_i / \sum_{i=1}^N X_i$  since it holds  
55 that  $\sum_{i=1}^N p_i = 1$ . The information content of the graph is then computed using the Shannon  
56 formula (Shannon, 1948):  $H = \sum_{i=1}^N p_i \log(p_i)$ . Another important definition of complexity was  
57 proposed by Kolmogorov (Kolmogorov, 1968). The Kolmogorov complexity of a network is the  
58 length of the shortest computer program that produces the network as output. Although  
59 Kolmogorov complexity is uncomputable it can be approximated to a degree that allows its  
60 practical use (Li & Vitányi, 2008).

61       The measures of complexity described above assume it to be a monotonically increasing  
62 function of disorder. However, complexity can also be defined as a monotonically increasing  
63 function of order, as shown by McShea (McShea, 1991), who found that the morphological  
64 complexity of organisms changed with the level of self-organization, and the latter with order.  
65 Finally, complexity can be defined as a convex function of disorder; i.e., a quantity that attains a  
66 minimum for both completely ordered and completely disordered systems, and a maximum at  
67 some intermediate level of disorder or order (López-Ruiz, Mancini, & Calbet, 1995; Shiner,  
68 Davison, & Landsberg, 1999; Tononi, Edelman, & Sporns, 1998). Here, we adopt this latter  
69 notion by assuming that network complexity achieves a minimum for random networks, also

70 known as Erdős-Renyi (ER) networks (Erdős & Rényi, 1959), and regular lattice (RL) networks  
71 (Watts & Strogatz, 1998).

72 In addition to the global complexity of the brain network, in this work we are interested in  
73 computing the local complexities (a measure for each of the different brain areas), such that the  
74 global complexity of the network is the sum of the local ones; i.e, the complexity of the system is  
75 the sum of the complexity of its parts. To estimate the complexities, we let a random walker  
76 diffuse on the network and construct a time series of the strengths of the nodes (brain areas)  
77 visited by the walker. The sample entropy (SampEn) (Richman & Moorman, 2000) of the time  
78 series is then calculated. Local complexities are obtained by iteratively removing a node and all  
79 its connections, constructing the time series from the walker movement in the resulting network,  
80 computing the SampEn, and comparing this value to the average value obtained from 1000 ER  
81 and 1000 RL networks with the same degree distribution and connections strengths.

82 Functional connectivity in the brain is defined as the synchronization of neurophysiological  
83 events among anatomically separated brain areas (Friston, Jezzard, & Turner, 1994). Biswal and  
84 colleagues (Biswal, Yetkin, Haughton, & Hyde, 1995) were the first to report that during resting-  
85 state the primary motor regions in the left and right hemispheres were positively correlated. Later  
86 studies identified positive correlations between regions that are now known to comprise the  
87 default mode network (DMN) (Buckner, Andrews-Hanna, & Schacter, 2008; Raichle et al.,  
88 2001). In addition to the reported correlated networks, anticorrelated networks have also been  
89 reported by several studies (Michael D. Fox, Zhang, Snyder, & Raichle, 2009; Gopinath,  
90 Krishnamurthy, Cabanban, & Crosson, 2015; Liang, King, & Zhang, 2012). Although  
91 anticorrelations have been attributed to the global signals removal recent studies suggest a  
92 physiological basis (Michael D. Fox et al., 2009; Kazeminejad & Sotero, 2019). For this reason,

93 in this paper we computed three different functional connectivity matrices for each subject using  
94 the Pearson correlation between the resting-state functional magnetic resonance imaging (fMRI)  
95 signals recorded from each of the 116 brain areas considered. A matrix consisting of the absolute  
96 value of all connections (denoted as **abs**), a matrix consisting of only the positive connections  
97 (denoted as **pos**) representing the positively correlated network, and a matrix comprising the  
98 absolute value of only the negative connections (denoted as **neg**) representing the anticorrelation  
99 network. We then compute the local complexities of the 116 brain areas, as well as the global  
100 complexities of the entire brain network, and seven known functional networks of the brain  
101 (Sedeño et al., 2016): default mode network (DMN), frontoparietal (FP), salience (SAL),  
102 sensorimotor (SM), visual (V), cerebellar (CER), and temporo-basal-ganglial (TBG) networks.  
103 Our results show that the **pos** network has higher global complexity than the **neg** and **abs**  
104 networks. We also found a link between complexity and functional connectivity which changes  
105 with the spatial scale and the type of brain network. For the **pos** network this link is significantly  
106 weaker at the local scale compared to the global scale, whereas for the **neg** network the link is  
107 stronger at the local scale than at the global scale, but still weaker than for the **pos** network. Also  
108 in the **pos** network global complexity was strongly correlated to the network integration and  
109 segregation, whereas **neg** was not significant correlated with integration and segregation. The  
110 network formed by taking the absolute value of the functional connectivity (**abs**) presented lower  
111 correlations than the **pos** case. Our results suggest that the **pos** network is related to the  
112 information processing in the brain network and should be used for functional connectivity  
113 analysis instead of the **abs** network.

114

## 115 **2. Methods**

116 *2.1. Data acquisition and preprocessing*

117       The resting-state fMRI dataset of 89 subjects from the NIH Human Connectome Project  
118 (HCP) (<https://db.humanconnectome.org>) (Van Essen et al., 2013) is used in this research.  
119 Each subject was involved in 4 runs of 15 minutes each using a 3 T Siemens scanner, while their  
120 eyes were open and had a relaxed fixation on a projected bright cross-hair on a dark background.  
121 The data were acquired with 2.0 mm isotropic voxels for 72 slices, TR=0.72 s, TE=33.1 ms,  
122 1200 frames per run, 0.58 ms echo spacing, and 2290 Hz/Px bandwidth (Moeller et al., 2010).  
123 Therefore, the fMRI data were acquired with a spatial resolution of  $2 \times 2 \times 2$  mm and a temporal  
124 resolution of 0.72 s, using multibands accelerated echo-planar imaging to generate a high quality  
125 and the most robust fMRI data. The fMRI data were spatially preprocessed to remove spatial  
126 artifacts produced by head motion,  $B_0$  distortions, and gradient nonlinearities (Jovicich et al.,  
127 2006). Since comparison of fMRI images across subjects and studies is possible when the images  
128 have been transformed from the subject's native volume space to the MNI space, fMRI images  
129 were wrapped and aligned into the MNI space with FSL's FLIRT 12 DOF affine and then a  
130 FNIRT nonlinear registration (Jenkinson, Bannister, Brady, & Smith, 2002) was performed. In  
131 this study, the MNI-152-2 mm atlas (Mazziotta et al., 2001) was utilized for fMRI data  
132 registration.

133 *2.2. Construction of functional connectivity matrices*

134       The peak voxel in each region, that is, the voxel of maximal activation, was selected by  
135 computing the Root Mean Square (RMS) for each voxel's fMRI signal over all time. It has been  
136 shown that the peak voxel provides the best effect of any voxel in the ROI (Sharot, Delgado, &  
137 Phelps, 2004). Additionally, the peak voxel activity correlates well with evoked scalp electrical  
138 potentials than approaches that average activity across the ROI. This means that the peak voxel

139 represents the ROI's activity better than other choices (Arthurs & Boniface, 2003). The peak  
140 voxel in each region is determined using previously published Talairach coordinates (after  
141 conversion to MNI coordinates and using AAL 116 atlas) (M. D. Fox et al., 2005). The resulting  
142 signal was filtered to keep only low frequency fluctuations (0.01–0.08 Hz) (Yan & Zang, 2010).  
143 Finally, the global signal (i.e., the average of the fMRI signals over the whole brain (Michael D.  
144 Fox et al., 2009)) was regressed out.

145 We then computed the Pearson correlation between all possible pairs of time series  
146 creating a 116x116 functional connectivity matrix for each subject. Three different networks  
147 were obtained from this matrix. A network consisting of the absolute value of all connections  
148 (denoted as **abs**) which is the most commonly used in fMRI connectivity studies (Meier et al.,  
149 2016; Meszlényi, Hermann, Buza, Gál, & Vidnyánszky, 2017; Salvador et al., 2005), a network  
150 consisting of only the positive connections (denoted as **pos**), and a network comprising the  
151 absolute value of only the negative connections (denoted as **neg**). In all cases  $p$ -values were  
152 corrected by means of a multiple comparison analysis based on the false discovery rate (FDR)  
153 (Benjamini & Hochberg, 1995).

### 154 2.3. Construction of the time series of the random walker's movements on the connectivity matrix

155 We first consider an unweighted network consisting of  $N$  nodes. We place a large number  
156  $K$  ( $K \gg N$ ) of random walkers onto this network. At each time step, the walkers move randomly  
157 (with the same probability) between the nodes that are directly linked to each other. We allow  
158 the walkers to perform  $T$  time steps. As a walker visits a node, we record the degree of the node.  
159 Thus, after  $T$  time steps, we obtain  $K$  time series reflecting different realizations of the random  
160 walker's movement on the network. Nodes with high degree (hubs) will appear more frequently  
161 in the series than nodes with low degree.

162 In the case of weighted networks, such as the functional connectivity matrix representing  
 163 the brain network, the transition probability  $p_{ij}$  from brain area  $i$  to brain area  $j$  is given by  
 164  $p_{ij} = w_{ij} / \sum_{j=1}^N w_{ij}$ , where  $w_{ij}$  is the weight of the connection from area  $i$  to area  $j$  (Zhang,  
 165 Shan, & Chen, 2013). We then construct a time series with the strengths of the nodes  $i$  visited by  
 166 the walker:  $str_i = \sum_{j=1}^N w_{ij}$ .

#### 167 2.4. Computing the entropy of the time series

168 In this paper we use sample entropy (SampEn) (Richman & Moorman, 2000) to estimate  
 169 the complexity of the time series of the diffusion of the random walker in the network. SampEn  
 170 improved from approximate entropy (ApEn) (Pincus, 1991) by reducing the bias caused by self-  
 171 matching. For a time series  $x(i)$ ,  $1 \leq i \leq N$ , of finite length  $N$ , we first reconstitute the  $N -$   
 172  $m + 1$  vectors  $X_m(i)$  following the form:

$$173 \quad X_m(i) = \{x(i), x(i + 1), \dots, x(i + m - 1)\}, \quad (1)$$

$$i = 1, 2, \dots, N - m + 1$$

174 where  $m$  is the embedding dimension.

175 Let  $G_i^m(r)$  be the probability that any vector  $X_m(j)$  is within distance  $r$  of  $X_m(i)$ :

$$176 \quad G_i^m(r) = \frac{1}{N-m+1} \sum_{j=1}^{N-m+1} \Theta(d_{ij}^m - r) \quad (2)$$

177 where  $d_{ij}^m$  is the distance between the vectors  $X_m(i)$  and  $X_m(j)$ , defined as:

$$178 \quad d_{ij}^m = \max(|x(i + k) - x(j - k)|), \quad (3)$$

$$k = 0, 1, \dots, m$$

179 When the embedding dimension is  $m$ , the total number of template matches is:

$$180 \quad B_m(r) = \frac{1}{N-m} \sum_{i=1}^{N-m} G_i^m(r) \quad (4)$$

181 Similarly, when the embedding dimension is  $m+1$ , the total number of template matches is:



182 
$$A_m(r) = \frac{1}{N-m} \sum_{i=1}^{N-m} G_i^{m+1}(r) \quad (5)$$

183 Finally, the SampEn of the time series is estimated by:

184 
$$\text{SampEn}(r, m, N) = -\ln \left( \frac{A_m(r)}{B_m(r)} \right) \quad (6)$$

185 *2.5. Computing local complexities and global complexity*

186 We propose to obtain local complexities  $c_i$  by 1) iteratively removing a node and all its  
187 connections, 2) constructing the time series from the random walker diffusion in the resulting  
188 network, and 3) computing the SampEn of the time series obtained in the previous step. For node  
189  $i$ , the resulting SampEn is labelled as  $H_{\neq i}$ . Then we compare this value to the average SampEn  
190 (computed followed the same procedure outlined before) of 1000 ER ( $\bar{H}_{ER}$ ) and 1000 RL  
191 networks ( $\bar{H}_{RL}$ ) of the same size (i.e,  $N-1$ ) and connections strengths taken from the original  
192 matrix. The local complexity is the percent this value is of the square of the entropy of the  
193 original matrix ( $H$ ), multiplied by the probability ( $p_i$ ) of the appearance of the node in the time  
194 series:

195 
$$c_i = 100p_i \frac{|(H_{\neq i} - \bar{H}_{ER})(H_{\neq i} - \bar{H}_{RL})|}{H^2} \quad (7)$$

196 Figure 1 shows the steps described above for computing the local complexities. The global  
197 complexity of the network  $C$  is then computed as the sum of the local complexities:

198 
$$C = \sum_{i=1}^N c_i \quad (8)$$

199 **3. Results**

200 **3.1.1 Global complexity of simulated complex networks**

201 As stated before, the goal of this work is to propose a new measure of structural  
202 complexity that is useful for brain networks. To demonstrate the usefulness of the quantity we  
203 defined, we start by measuring how changes in the underlying network structure affects the

204 observed values of global complexity. To this end, we devised a scenario in which the network  
205 gradually transforms from the perfectly orderly state (regular lattice network) to a completely  
206 random state (Erdos-Renyi network). Following equations (7) and (8) we expect complexity to  
207 have a minimum at these states. Network states different from these minimums would have a  
208 mixture of order and disorder and thus were modeled using the small-world model (Watts &  
209 Strogatz, 1998). In this model, nodes of the network are placed on a regular  $k$ -dimensional grid  
210 and each node is connected to  $m$  of its nearest neighbours, producing a regular lattice of nodes  
211 with equal degrees. Then, with probability  $p$ , each connection is randomly randomly rewired.  
212 The RL network corresponds to the value  $p = 0$ . When  $p > 0$ , edge rewiring is applied, and this  
213 changes the degree distribution of nodes. On the other end of the spectrum is the ER model  
214 (Erdős & Rényi, 1959), obtained when  $p = 1$ , in which there is no connectivity pattern between  
215 nodes. In between, SW networks, obtained for values  $0 < p < 1$ , present high clustering and  
216 short path length (Watts & Strogatz, 1998).

217 Graph theoretical studies of mammalian cortical networks recreated from tract tracing  
218 experiments demonstrated that the cat and macaque interareal anatomical networks share similar  
219 small world properties of short path length and high clustering (Hilgetag & Kaiser, 2004; Sporns  
220 & Zwi, 2004). Additionally, studies of anatomical and functional connectivity networks  
221 estimated from human neuroimaging data also found small world characteristics (Bassett &  
222 Bullmore, 2006; Salvador et al., 2005). To simulate RL, SW and ER networks we use Matlab  
223 function 'WattsStrogatz.m' which has as inputs the parameters  $k$  and  $p$ .

224 Figure 2A shows examples of matrices of size  $N = 100$ , for five different values of the  
225 rewiring probability  $p$ , and three values of the mean node degree  $k$ . The weights in the network  
226 were generated from a uniform random distribution with values between 0 and 1. We then placed

227  $10^4$  random walkers onto these networks. The steps for estimating the global complexity of the  
228 network are presented in Figure 1 and described in detail in the Methods section. Figure 2B  
229 shows the global complexity of a network as a function of the rewiring probability  $p$ . Three  
230 different values of the average node degree were used  $k = 6, 8, 10$ . The results show that for a  
231 fixed network size the maximum global complexity decreases with the increase of  $k$  (the  
232 network gets denser). Additionally, the probability at which the peak in complexity was  
233 achieved, also decreased with the increase of  $k$ .

### 234 *3.1.2 Complexity analysis of large-scale human brain networks*

235 Figure 3A displays these matrices for one subject. Figure 3B shows the node degree of the  
236 three matrices average across all subjects, figure 3C shows their entropy, and figure 3D their  
237 global complexity. Our results show that the **pos** matrices are sparser than the **neg** matrices but  
238 have approximately the same entropy. This results in the **pos** network having a higher global  
239 complexity than the **neg** matrices. The **abs** matrices presented the lowest global complexity of  
240 the three cases.

241 Figure 4A shows the linear fits between the global complexity and the sum of the  
242 functional connectivity strengths (SFCS) of the entire brain network for the **abs**, **pos**, and **neg**  
243 cases. We found that for the **pos** case, there is a strong correlation ( $r = 0.62, p = 9.5e^{-11}$ )  
244 between global complexity and SFCS, followed by the **abs** case ( $r = 0.28, p = 0.0077$ ). The  
245 anticorrelation network was not significantly correlated with SFCS ( $r = 0.11, p = 0.29$ ). We  
246 also computed the linear fits between local complexities and the SFCS of each brain area (figure  
247 4B). We found that for the **pos** case the link between complexity and functional connectivity was  
248 significantly weaker at the local scale compared to the global scale ( $r = 0.22, p = 2e^{-23}$ ). For  
249 the anticorrelation network the link was stronger at the local ( $r = 0.18, p = 3e^{-21}$ ) than at the

250 global scale, but still weaker than for the **pos** case. The correlation between complexity and  
251 connectivity was essentially the same at the global and local scales for the **abs** case (figure 4).

252 Complex networks are expected to present high values of both integration and segregation.  
253 Thus, we also explored the link between them and global complexity (figure 5). Integration and  
254 segregation were estimated using the global efficiency and average clustering coefficient of the  
255 network, respectively (Sporns, 2013). We found strong correlations between global complexity  
256 and both integration ( $r = 0.55, p = 2.7e^{-8}$ ) and segregation ( $r = 0.59, p = 2e^{-9}$ ) for the **pos**  
257 network, and lower values for the **abs** case ( $r = 0.26, p = 0.016$  for the correlation with  
258 integration and  $r = 0.28, p = 0.008$  for the correlation with segregation). No significant  
259 correlations were found for the **neg** case.

260 We also investigated the link between the three network types at the global (figure 6A) and  
261 local scales (figure 6B) finding that the **pos** and **neg** networks are not significantly correlated at  
262 any spatial scale.

263 Figure 7 presents the local complexity of the 116 brain areas for the **pos** and **neg** cases.  
264 Seven resting-state networks (Sedeño et al., 2016) were considered (DMN, FP, SAL, CER, V,  
265 SM, TGB) as well as areas that were not allocated to a network (NA). In both **pos** and **neg** cases,  
266 the area with the highest complexity belongs to the DMN (Angular R and Frontal Med Orb R).  
267 Figure 8 displays the local complexity for the **abs** case and the sum of the complexities of the  
268 **neg** and **pos** case (**neg+pos**). In the **abs** case, the highest complexity was obtained for the left  
269 paracentral lobule, while the right angular gyrus presented the highest complexity for the  
270 **neg+pos** case.

271 We computed the global complexity of the seven resting-state networks (figure 9A). We  
272 found that the network with the highest complexity for all cases was the cerebellar network,

273 while the network with the lowest complexity was the salience network. The DMN, FP, CER, V  
274 and SM networks presented more complexity in the **pos** than in the **neg** case, while the SAL and  
275 TGB networks were more complex in the **neg** case. When interpreting this result we need to be  
276 aware of the fact that since the global complexity of the network is computed as the sum of the  
277 local complexities (equation 8), networks comprising few brain areas (as is the case of the  
278 salience network) will have a low value of global complexity provided that the difference in the  
279 values of the local complexities is not high (see figures 7 and 8). To account for this issue, we  
280 also divided the global complexity of each network by the number of areas in each network  
281 (figure 9B). As a result, although the average contribution of the areas in the salience network to  
282 the network complexity is still the lowest among the seven resting state networks for the **pos**  
283 case, it is the areas in the visual network the ones with the lowest contribution in the **neg** case.

284 Along these lines, hemispherical differences can be investigated as well. Previous studies  
285 have found interhemispheric asymmetry in brain connectivity during resting-state (Medvedev,  
286 2014). We found that the left hemisphere was significantly more complex than the right  
287 hemisphere for the seven resting-state networks (figure 10).

288

## 289 **Discussion**

290 In this study we proposed a new measure of network (global) complexity that is  
291 constructed as the sum of the complexities of its nodes. The complexity of each node (i.e, local  
292 complexity) was estimated as an index that compares the sample entropy of the time series  
293 generated by the movement of a random walker on the network resulting from removing the  
294 node and its connections, to the sample entropy of the time series obtained from a regular lattice  
295 (the ordered state) and an Erdos-renyi network (disordered state). Our simulations demonstrated

296 that our measure of complexity (equations (7)-(8)), achieves a minimum for the regular lattice  
297 and Erdos-Renyi networks, and a maximum at some intermediate state, representing a small-  
298 world network with both order and disorder characteristics (figure 2). The rationale behind the  
299 use of random walks is that diffusion process are capable of uncovering the large-scale  
300 topological structure of complex networks (Noh & Rieger, 2004; Simonsen, Astrup Eriksen,  
301 Maslov, & Sneppen, 2004; Skardal & Adhikari, 2018). For instance, random walks are the basis  
302 of Infomap (Rosvall & Bergstrom, 2008), a popular method for detecting community structure in  
303 complex networks. Past studies of anatomical and functional brain connectivity have found  
304 interlinked communities that form a partly decomposable modular architecture (Ashourvan,  
305 Telesford, Verstynen, Vettel, & Bassett, 2019; Meunier, Lambiotte, Fornito, Ersche, &  
306 Bullmore, 2009). Such architectures are hallmarks of complex systems and are thought to be of  
307 fundamental importance for understanding mental processing and cognition (Bola & Borchardt,  
308 2016). In the brain, hierarchies of linked communities span across several levels including brain  
309 regions, functional circuits and large-scale networks. This structural diversity cannot be captured  
310 by previous structural complexity measures relying mainly on Shannon entropy (Shannon,  
311 1948), but can be probed using random walks (Rosvall & Bergstrom, 2008).

312       Once we constructed the time series of the random walker's movement in the network, we  
313 needed a measure to estimate its complexity. There is a diversity of complexity measures based  
314 on different entropy definitions, such as: Shannon entropy (Shannon, 1948), Tsallis entropy  
315 (Tsallis, 1988), spectral entropy (Inouye et al., 1991), wavelet entropy (Rosso et al., 2001),  
316 approximate entropy (Pincus, 1991), sample entropy (Richman & Moorman, 2000), fuzzy  
317 entropy (Weiting Chen, Zhizhong Wang, Hongbo Xie, & Wangxin Yu, 2007), and permutation  
318 entropy (Bandt & Pompe, 2002). In this work we selected sample entropy since it can quantify

319 the amount of regularity and unpredictability of fluctuations in a time series (Richman &  
320 Moorman, 2000). This is important because of the presence of communities in brain networks  
321 (Ashourvan et al., 2019; Meunier et al., 2009), which will result in repetitive patterns of nodes in  
322 the time series of the random walker's movement (Fortunato & Hric, 2016).

323 Our study of brain complexity found interhemispheric asymmetry, where the left  
324 hemisphere was significantly more complex than the right hemisphere, for all the seven brain  
325 networks explored. Previous studies have also found interhemispheric asymmetry in brain  
326 connectivity during resting-state. For instance, a recent study used near-infrared spectroscopy  
327 (NIRS) signals to estimated functional connectivity matrices (Medvedev, 2014). Their results  
328 revealed significantly stronger and denser connectivity patterns in the right hemisphere in most  
329 subjects. This denser pattern of connections in the right hemisphere compared to the left  
330 hemisphere can lead to a lower structural complexity if it is not accompanied with a significant  
331 increase in the entropy of the network. Thus, the balance between the entropy of the network and  
332 its density determines the network's complexity. This was exemplified in figure 3 where we  
333 found that the entropy of the positive network and the anti-correlated network were essentially  
334 the same, but the positive network was sparser, which resulted in it being more complex than the  
335 anti-correlated network.

336

### 337 **Acknowledgments**

338 This work was partially supported by grant RGPIN-2015-05966 from Natural Sciences and  
339 Engineering Research Council of Canada. Data were provided [in part] by the Human  
340 Connectome Project, WU-Minn Consortium (Principal Investigators: David Van Essen and  
341 Kamil Ugurbil; 1U54MH091657) funded by the 16 NIH Institutes and Centers that support the

342 NIH Blueprint for Neuroscience Research; and by the McDonnell Center for Systems  
343 Neuroscience at Washington University.

344

345

## 346 **References**

347 Arthurs, O. J., & Boniface, S. J. (2003). What aspect of the fMRI BOLD signal best reflects the  
348 underlying electrophysiology in human somatosensory cortex? *Clinical Neurophysiology*:  
349 *Official Journal of the International Federation of Clinical Neurophysiology*, *114*(7), 1203–  
350 1209. Retrieved from <http://www.ncbi.nlm.nih.gov/pubmed/12842716>

351 Ashourvan, A., Telesford, Q. K., Verstynen, T., Vettel, J. M., & Bassett, D. S. (2019). Multi-  
352 scale detection of hierarchical community architecture in structural and functional brain  
353 networks. *PLOS ONE*, *14*(5), e0215520. <https://doi.org/10.1371/journal.pone.0215520>

354 Bandt, C., & Pompe, B. (2002). Permutation Entropy: A Natural Complexity Measure for Time  
355 Series. *Physical Review Letters*, *88*(17), 174102.  
356 <https://doi.org/10.1103/PhysRevLett.88.174102>

357 Bassett, D. S., & Bullmore, E. (2006). Small-World Brain Networks. *The Neuroscientist*, *12*(6),  
358 512–523. <https://doi.org/10.1177/1073858406293182>

359 Benjamini, Y., & Hochberg, Y. (1995). *Controlling the False Discovery Rate: A Practical and*  
360 *Powerful Approach to Multiple Testing*. Source: *Journal of the Royal Statistical Society*.  
361 *Series B (Methodological)* (Vol. 57). Retrieved from  
362 [http://enr.case.edu/ray\\_soumya/mlrg/controlling\\_fdr\\_benjamini95.pdf](http://enr.case.edu/ray_soumya/mlrg/controlling_fdr_benjamini95.pdf)

363 Biswal, B., Yetkin, F. Z., Haughton, V. M., & Hyde, J. S. (1995). Functional connectivity in the  
364 motor cortex of resting human brain using echo-planar MRI. *Magnetic Resonance in*



- 365 *Medicine*, 34(4), 537–541. Retrieved from <http://www.ncbi.nlm.nih.gov/pubmed/8524021>
- 366 Bola, M., & Borchardt, V. (2016). Cognitive Processing Involves Dynamic Reorganization of the  
367 Whole-Brain Network’s Functional Community Structure. *Journal of Neuroscience*, 36(13),  
368 3633–3635. <https://doi.org/10.1523/JNEUROSCI.0106-16.2016>
- 369 Bonchev, D., & Buck, G. A. (2005). Quantitative Measures of Network Complexity. In  
370 *Complexity in Chemistry, Biology, and Ecology* (pp. 191–235). Boston, MA: Springer US.  
371 [https://doi.org/10.1007/0-387-25871-X\\_5](https://doi.org/10.1007/0-387-25871-X_5)
- 372 Buckner, R. L., Andrews-Hanna, J. R., & Schacter, D. L. (2008). The Brain’s Default Network.  
373 *Annals of the New York Academy of Sciences*, 1124(1), 1–38.  
374 <https://doi.org/10.1196/annals.1440.011>
- 375 Dehmer, M., Barbarini, N., Varmuza, K., & Graber, A. (2009). A Large Scale Analysis of  
376 Information-Theoretic Network Complexity Measures Using Chemical Structures. *PLoS*  
377 *ONE*, 4(12), e8057. <https://doi.org/10.1371/journal.pone.0008057>
- 378 Erdős, & Rényi, A. (1959). On random graphs, I. *Publicationes Mathematicae (Debrecen)*, 6.
- 379 Fortunato, S., & Hric, D. (2016). Community detection in networks: A user guide. *Physics*  
380 *Reports*, 659, 1–44. <https://doi.org/10.1016/J.PHYSREP.2016.09.002>
- 381 Fox, M. D., Snyder, A. Z., Vincent, J. L., Corbetta, M., Van Essen, D. C., & Raichle, M. E.  
382 (2005). The human brain is intrinsically organized into dynamic, anticorrelated functional  
383 networks. *Proceedings of the National Academy of Sciences*, 102(27), 9673–9678.  
384 <https://doi.org/10.1073/pnas.0504136102>
- 385 Fox, Michael D., Zhang, D., Snyder, A. Z., & Raichle, M. E. (2009). The Global Signal and  
386 Observed Anticorrelated Resting State Brain Networks. *Journal of Neurophysiology*,  
387 101(6), 3270–3283. <https://doi.org/10.1152/jn.90777.2008>

- 388 Friston, K. J., Jezzard, P., & Turner, R. (1994). Analysis of functional MRI time-series. *Human*  
389 *Brain Mapping*, 1(2), 153–171. <https://doi.org/10.1002/hbm.460010207>
- 390 Gopinath, K., Krishnamurthy, V., Cabanban, R., & Crosson, B. A. (2015). Hubs of  
391 Anticorrelation in High-Resolution Resting-State Functional Connectivity Network  
392 Architecture. *Brain Connectivity*, 5(5), 267–275. <https://doi.org/10.1089/brain.2014.0323>
- 393 Hilgetag, C. C., & Kaiser, M. (2004). Clustered Organization of Cortical Connectivity.  
394 *Neuroinformatics*, 2(3), 353–360. <https://doi.org/10.1385/NI:2:3:353>
- 395 Inouye, T., Shinosaki, K., Sakamoto, H., Toi, S., Ukai, S., Iyama, A., ... Hirano, M. (1991).  
396 Quantification of EEG irregularity by use of the entropy of the power spectrum.  
397 *Electroencephalography and Clinical Neurophysiology*, 79(3), 204–210. Retrieved from  
398 <http://www.ncbi.nlm.nih.gov/pubmed/1714811>
- 399 Jenkinson, M., Bannister, P., Brady, M., & Smith, S. (2002). Improved optimization for the  
400 robust and accurate linear registration and motion correction of brain images. *NeuroImage*,  
401 17(2), 825–841. Retrieved from <http://www.ncbi.nlm.nih.gov/pubmed/12377157>
- 402 Jovicich, J., Czanner, S., Greve, D., Haley, E., van der Kouwe, A., Gollub, R., ... Dale, A.  
403 (2006). Reliability in multi-site structural MRI studies: Effects of gradient non-linearity  
404 correction on phantom and human data. *NeuroImage*, 30(2), 436–443.  
405 <https://doi.org/10.1016/j.neuroimage.2005.09.046>
- 406 Kazeminejad, A., & Sotero, R. (2019). The Importance of Anti-Correlations in Graph Theory  
407 Based Classification of Autism Spectrum Disorder. *BioRxiv*, 557512.  
408 <https://doi.org/10.1101/557512>
- 409 Kolmogorov, A. N. (1968). Three approaches to the quantitative definition of information.  
410 *International Journal of Computer Mathematics*, 2(1–4), 157–168.

- 411 <https://doi.org/10.1080/00207166808803030>
- 412 Li, M., & Vitányi, P. M. B. (2008). *An introduction to Kolmogorov complexity and its*  
413 *applications*. Springer.
- 414 Liang, Z., King, J., & Zhang, N. (2012). Anticorrelated resting-state functional connectivity in  
415 awake rat brain. *NeuroImage*, 59(2), 1190–1199.  
416 <https://doi.org/10.1016/j.neuroimage.2011.08.009>
- 417 López-Ruiz, R., Mancini, H. L., & Calbet, X. (1995). A statistical measure of complexity.  
418 *Physics Letters A*, 209(5–6), 321–326. [https://doi.org/10.1016/0375-9601\(95\)00867-5](https://doi.org/10.1016/0375-9601(95)00867-5)
- 419 Mazziotta, J., Toga, A., Evans, A., Fox, P., Lancaster, J., Zilles, K., ... Mazoyer, B. (2001). A  
420 four-dimensional probabilistic atlas of the human brain. *Journal of the American Medical*  
421 *Informatics Association* □: *JAMIA*, 8(5), 401–430. Retrieved from  
422 <http://www.ncbi.nlm.nih.gov/pubmed/11522763>
- 423 McShea, D. W. (1991). Complexity and evolution: What everybody knows. *Biology &*  
424 *Philosophy*, 6(3), 303–324. <https://doi.org/10.1007/BF00132234>
- 425 Medvedev, A. V. (2014). Does the resting state connectivity have hemispheric asymmetry? A  
426 near-infrared spectroscopy study. *NeuroImage*, 85 Pt 1(0 1), 400–407.  
427 <https://doi.org/10.1016/j.neuroimage.2013.05.092>
- 428 Meier, J., Tewarie, P., Hillebrand, A., Douw, L., van Dijk, B. W., Stufflebeam, S. M., & Van  
429 Mieghem, P. (2016). A Mapping Between Structural and Functional Brain Networks. *Brain*  
430 *Connectivity*, 6(4), 298–311. <https://doi.org/10.1089/brain.2015.0408>
- 431 Meszlényi, R. J., Hermann, P., Buza, K., Gál, V., & Vidnyánszky, Z. (2017). Resting State fMRI  
432 Functional Connectivity Analysis Using Dynamic Time Warping. *Frontiers in*  
433 *Neuroscience*, 11, 75. <https://doi.org/10.3389/fnins.2017.00075>

- 434 Meunier, D., Lambiotte, R., Fornito, A., Ersche, K., & Bullmore, E. T. (2009). Hierarchical  
435 modularity in human brain functional networks. *Frontiers in Neuroinformatics*, 3, 37.  
436 <https://doi.org/10.3389/neuro.11.037.2009>
- 437 Moeller, S., Yacoub, E., Olman, C. A., Auerbach, E., Strupp, J., Harel, N., & Ugurbil, K. (2010).  
438 Multiband multislice GE-EPI at 7 tesla, with 16-fold acceleration using partial parallel  
439 imaging with application to high spatial and temporal whole-brain fMRI. *Magnetic  
440 Resonance in Medicine*, 63(5), 1144–1153. <https://doi.org/10.1002/mrm.22361>
- 441 Noh, J. D., & Rieger, H. (2004). Random Walks on Complex Networks. *Physical Review  
442 Letters*, 92(11), 118701. <https://doi.org/10.1103/PhysRevLett.92.118701>
- 443 Pincus, S. M. (1991). Approximate entropy as a measure of system complexity. *Proceedings of  
444 the National Academy of Sciences of the United States of America*, 88(6), 2297–2301.  
445 <https://doi.org/10.1073/PNAS.88.6.2297>
- 446 Raichle, M. E., MacLeod, A. M., Snyder, A. Z., Powers, W. J., Gusnard, D. A., & Shulman, G.  
447 L. (2001). A default mode of brain function. *Proceedings of the National Academy of  
448 Sciences of the United States of America*, 98(2), 676–682.  
449 <https://doi.org/10.1073/pnas.98.2.676>
- 450 Richman, J. S., & Moorman, J. R. (2000). Physiological time-series analysis using approximate  
451 entropy and sample entropy. *American Journal of Physiology-Heart and Circulatory  
452 Physiology*, 278(6), H2039–H2049. <https://doi.org/10.1152/ajpheart.2000.278.6.H2039>
- 453 Rosso, O. A., Blanco, S., Yordanova, J., Kolev, V., Figliola, A., Schürmann, M., & Başar, E.  
454 (2001). Wavelet entropy: a new tool for analysis of short duration brain electrical signals.  
455 *Journal of Neuroscience Methods*, 105(1), 65–75. Retrieved from  
456 <http://www.ncbi.nlm.nih.gov/pubmed/11166367>

- 457 Rosvall, M., & Bergstrom, C. T. (2008). Maps of random walks on complex networks reveal  
458 community structure. *Proceedings of the National Academy of Sciences of the United States*  
459 *of America*, 105(4), 1118–1123. <https://doi.org/10.1073/pnas.0706851105>
- 460 Salvador, R., Suckling, J., Coleman, M. R., Pickard, J. D., Menon, D., & Bullmore, E. (2005).  
461 Neurophysiological Architecture of Functional Magnetic Resonance Images of Human  
462 Brain. *Cerebral Cortex*, 15(9), 1332–1342. <https://doi.org/10.1093/cercor/bhi016>
- 463 Sedeño, L., Couto, B., García-Cordero, I., Melloni, M., Baez, S., Morales Sepúlveda, J. P., ...  
464 Ibanez, A. (2016). Brain Network Organization and Social Executive Performance in  
465 Frontotemporal Dementia. *Journal of the International Neuropsychological Society*, 22(2),  
466 250–262. <https://doi.org/10.1017/S1355617715000703>
- 467 Shannon, C. E. (1948). A Mathematical Theory of Communication. *Bell System Technical*  
468 *Journal*, 27(3), 379–423. <https://doi.org/10.1002/j.1538-7305.1948.tb01338.x>
- 469 Sharot, T., Delgado, M. R., & Phelps, E. A. (2004). How emotion enhances the feeling of  
470 remembering. *Nature Neuroscience*, 7(12), 1376–1380. <https://doi.org/10.1038/nn1353>
- 471 Shiner, J. S., Davison, M., & Landsberg, P. T. (1999). Simple measure for complexity. *Physical*  
472 *Review E*, 59(2), 1459–1464. <https://doi.org/10.1103/PhysRevE.59.1459>
- 473 Simonsen, I., Astrup Eriksen, K., Maslov, S., & Sneppen, K. (2004). Diffusion on complex  
474 networks: a way to probe their large-scale topological structures. *Physica A: Statistical*  
475 *Mechanics and Its Applications*, 336(1–2), 163–173.  
476 <https://doi.org/10.1016/J.PHYSA.2004.01.021>
- 477 Skardal, P. S., & Adhikari, S. (2018). Dynamics of Nonlinear Random Walks on Complex  
478 Networks. *Journal of Nonlinear Science*, 1–26. <https://doi.org/10.1007/s00332-018-9521-7>
- 479 Sporns, O. (2013). Network attributes for segregation and integration in the human brain.

- 480 *Current Opinion in Neurobiology*, 23(2), 162–171.
- 481 <https://doi.org/10.1016/j.conb.2012.11.015>
- 482 Sporns, O., & Zwi, J. D. (2004). The Small World of the Cerebral Cortex. *Neuroinformatics*,
- 483 2(2), 145–162. <https://doi.org/10.1385/NI:2:2:145>
- 484 Tononi, G., Edelman, G. M., & Sporns, O. (1998). Complexity and coherency: integrating
- 485 information in the brain. *Trends in Cognitive Sciences*, 2(12), 474–484.
- 486 [https://doi.org/10.1016/S1364-6613\(98\)01259-5](https://doi.org/10.1016/S1364-6613(98)01259-5)
- 487 Tsallis, C. (1988). Possible generalization of Boltzmann-Gibbs statistics. *Journal of Statistical*
- 488 *Physics*, 52(1–2), 479–487. <https://doi.org/10.1007/BF01016429>
- 489 Van Essen, D. C., Smith, S. M., Barch, D. M., Behrens, T. E. J., Yacoub, E., Ugurbil, K., & WU-
- 490 Minn HCP Consortium. (2013). The WU-Minn Human Connectome Project: An overview.
- 491 *NeuroImage*, 80, 62–79. <https://doi.org/10.1016/j.neuroimage.2013.05.041>
- 492 Watts, D. J., & Strogatz, S. H. (1998). Collective dynamics of ‘small-world’ networks. *Nature*,
- 493 393(6684), 440–442. <https://doi.org/10.1038/30918>
- 494 Weiting Chen, Zhizhong Wang, Hongbo Xie, & Wangxin Yu. (2007). Characterization of
- 495 Surface EMG Signal Based on Fuzzy Entropy. *IEEE Transactions on Neural Systems and*
- 496 *Rehabilitation Engineering*, 15(2), 266–272. <https://doi.org/10.1109/TNSRE.2007.897025>
- 497 Yan, C., & Zang, Y. (2010). DPARSF: a MATLAB toolbox for “pipeline” data analysis of
- 498 resting-state fMRI. *Frontiers in System Neuroscience*, 4, 13.
- 499 <https://doi.org/10.3389/fnsys.2010.00013>
- 500 Zhang, Z., Shan, T., & Chen, G. (2013). Random walks on weighted networks. *Physical Review*
- 501 *E*, 87(1), 012112. <https://doi.org/10.1103/PhysRevE.87.012112>
- 502

503

504

505

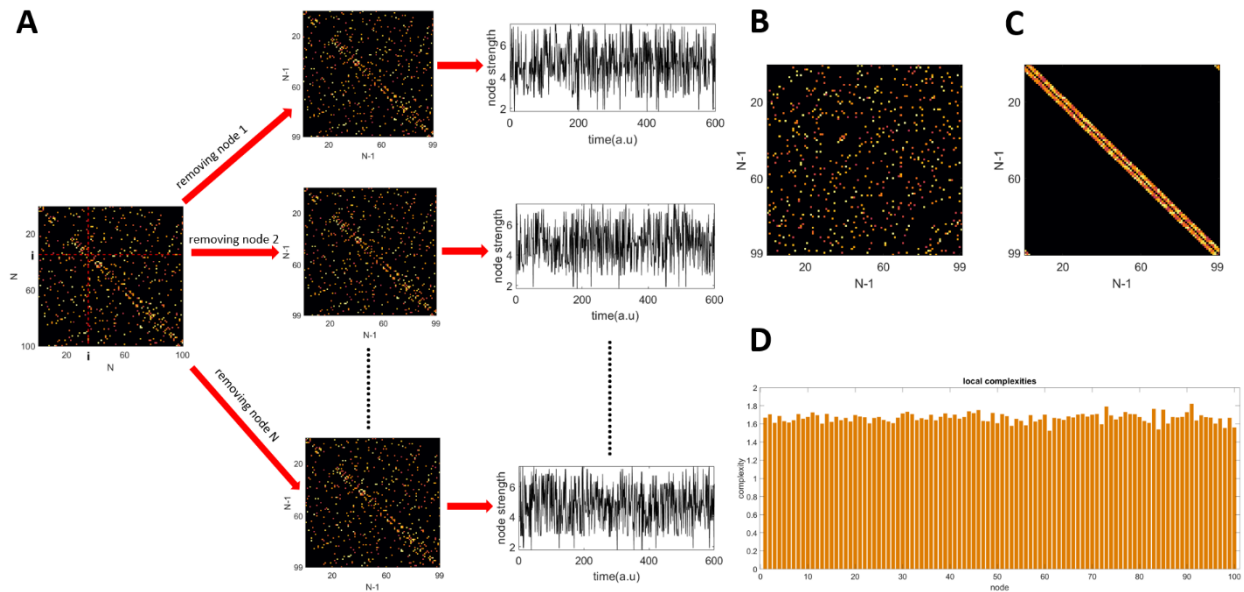

506

507 **Figure 1.** Methodology for computing local complexities. A) Given a connectivity matrix of size  
508  $N$ , each node is removed iteratively and a new matrix of size  $(N-1) \times (N-1)$  is obtained. Then a  
509 time series of node strengths is constructed from the diffusion of a random walker in the new  
510 matrix. B) A random network of size  $(N-1) \times (N-1)$  with the same average degree and strengths as  
511 the matrices obtained in A. C) A regular network of size  $(N-1) \times (N-1)$  with the same average  
512 degree and strengths as the matrices obtained in A. D) Local complexities.

513

514

515

516

517

518

519

520

521

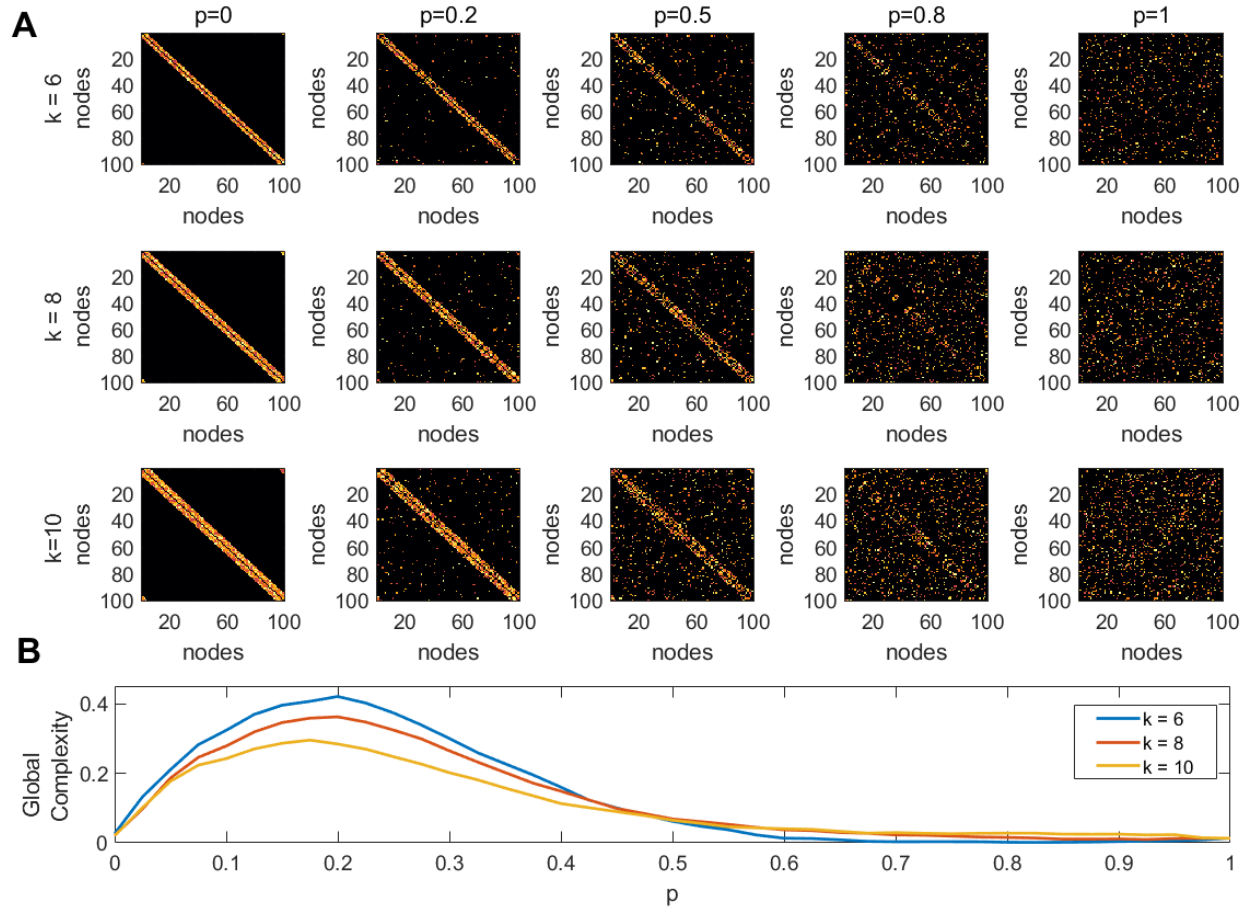

522

523 **Figure 2.** Global complexity of simulated networks. A) All networks have the same size  
524  $N = 100$ , and were simulated using the Watts and Strogatz algorithm for creating small-world  
525 networks. The inputs to the model are the rewiring probability  $p$ , and mean node degree  $k$ . B)  
526 Global complexity as function of the rewiring probability  $p$ .

527

528

529

530

531

532



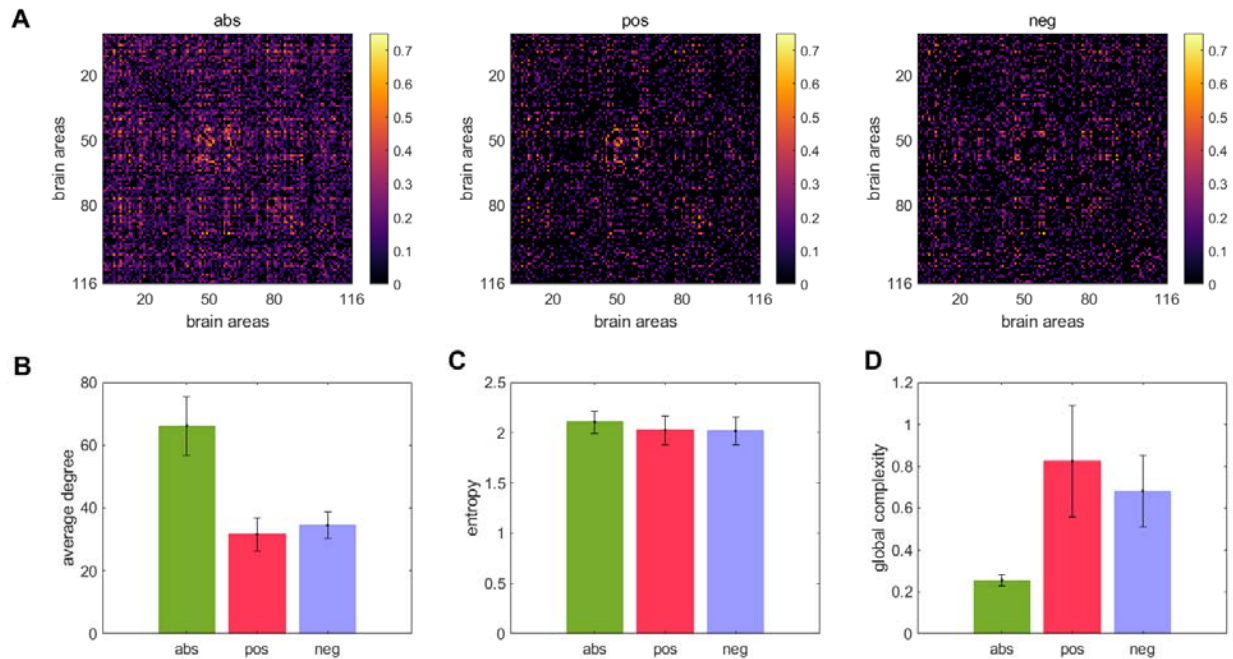

533

534 **Figure 3.** Global complexity of the entire brain network. A) A matrix consisting of the absolute  
535 value of all connections (denoted as **abs**), a matrix consisting of only the positive connections  
536 (denoted as **pos**), and a matrix comprising the absolute value of only the negative connections  
537 (denoted as **neg**). B) node degree averaged across subjects C) entropy averaged across subjects.  
538 D) global complexity averaged across subjects.

539

540

541

542

543

544

545

546

547

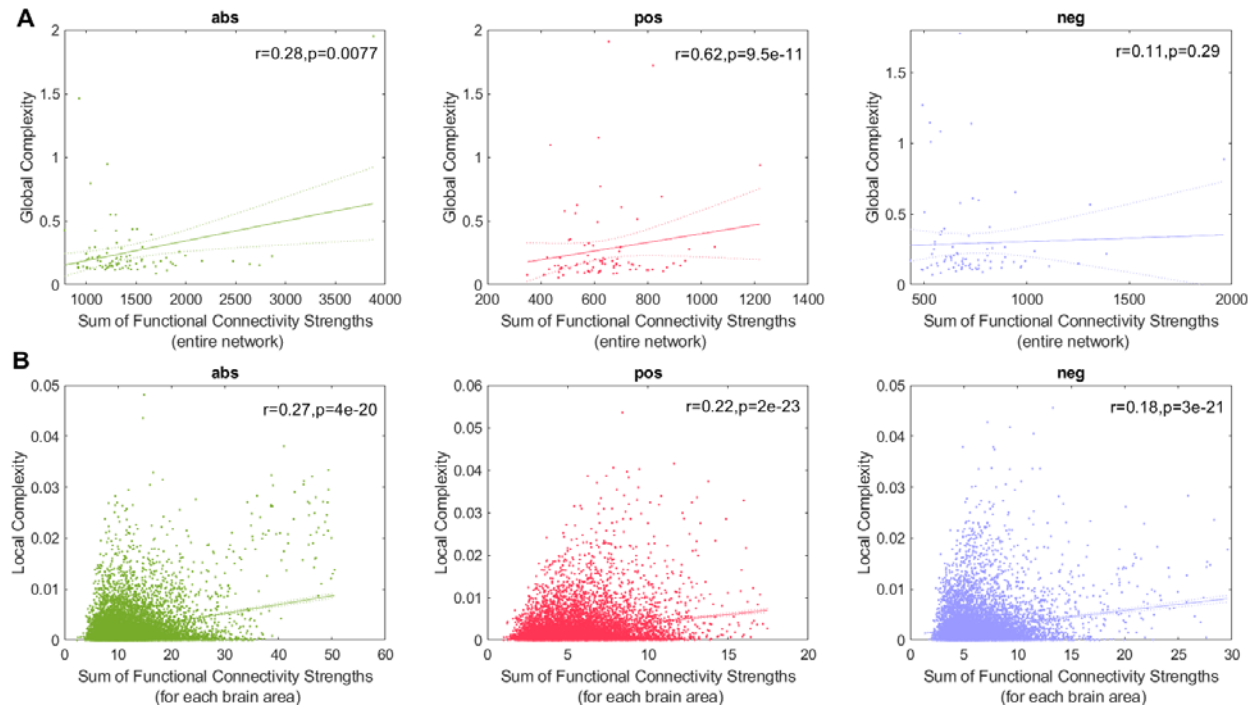

548

549 **Figure 4.** Link between Global complexity (A) and local complexities (B) and the sum of  
550 functional connectivity strengths. The **abs**, **pos** and **neg** networks appear in that order from left  
551 to right.

552

553

554

555

556

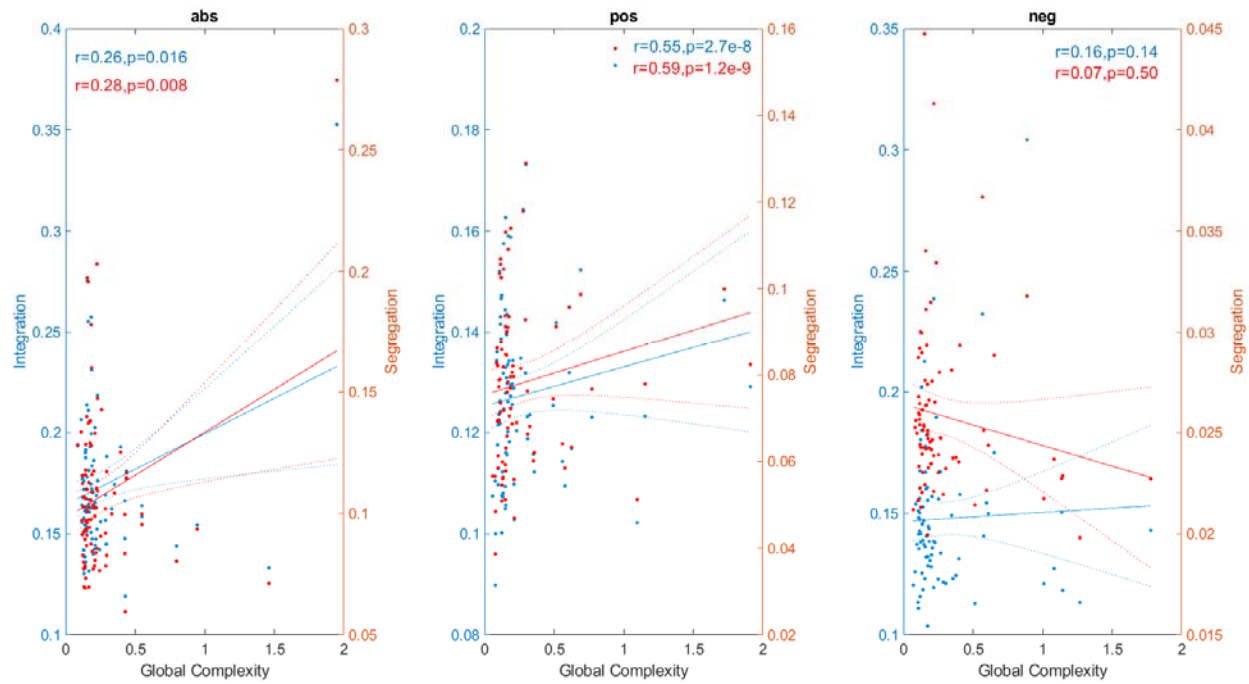

557

558 **Figure 5.** Link between global complexity and integration (blue) and segregation (red).

559

560

561

562

563

564

565

566

567

568

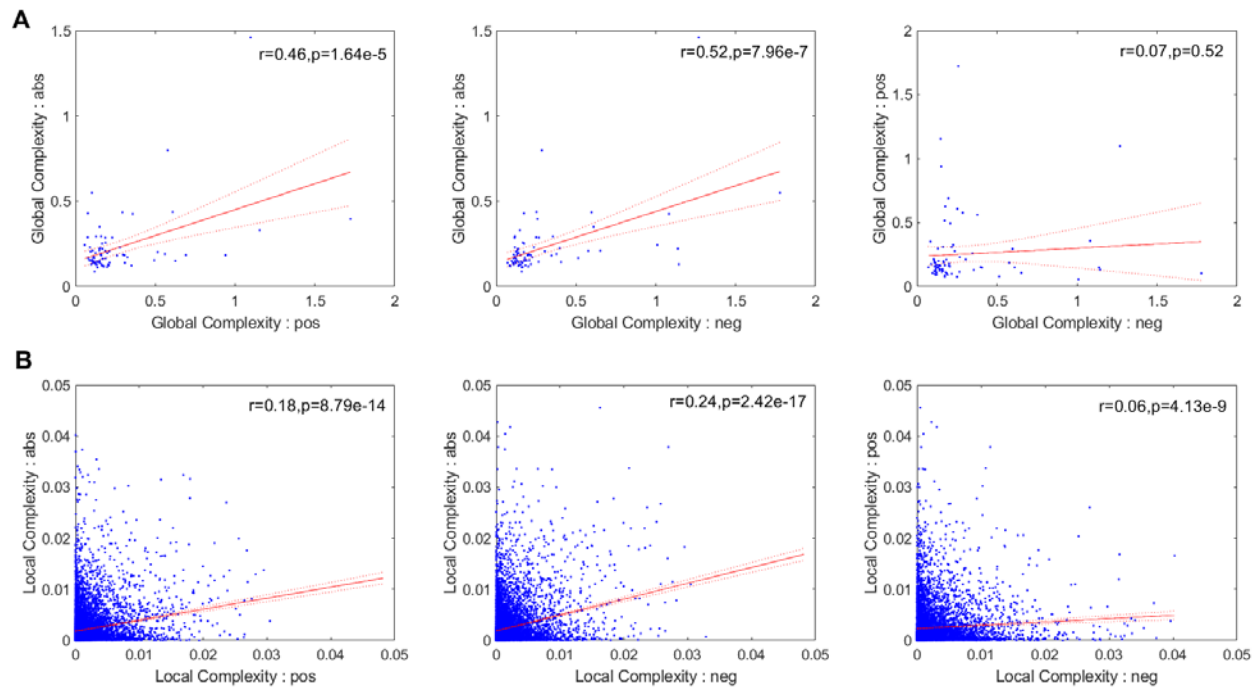

569

570 **Figure 6.** Link between the three network types (**abs**, **pos**, and **neg**) at the global (A) and local  
571 (B) scales.

572

573

574

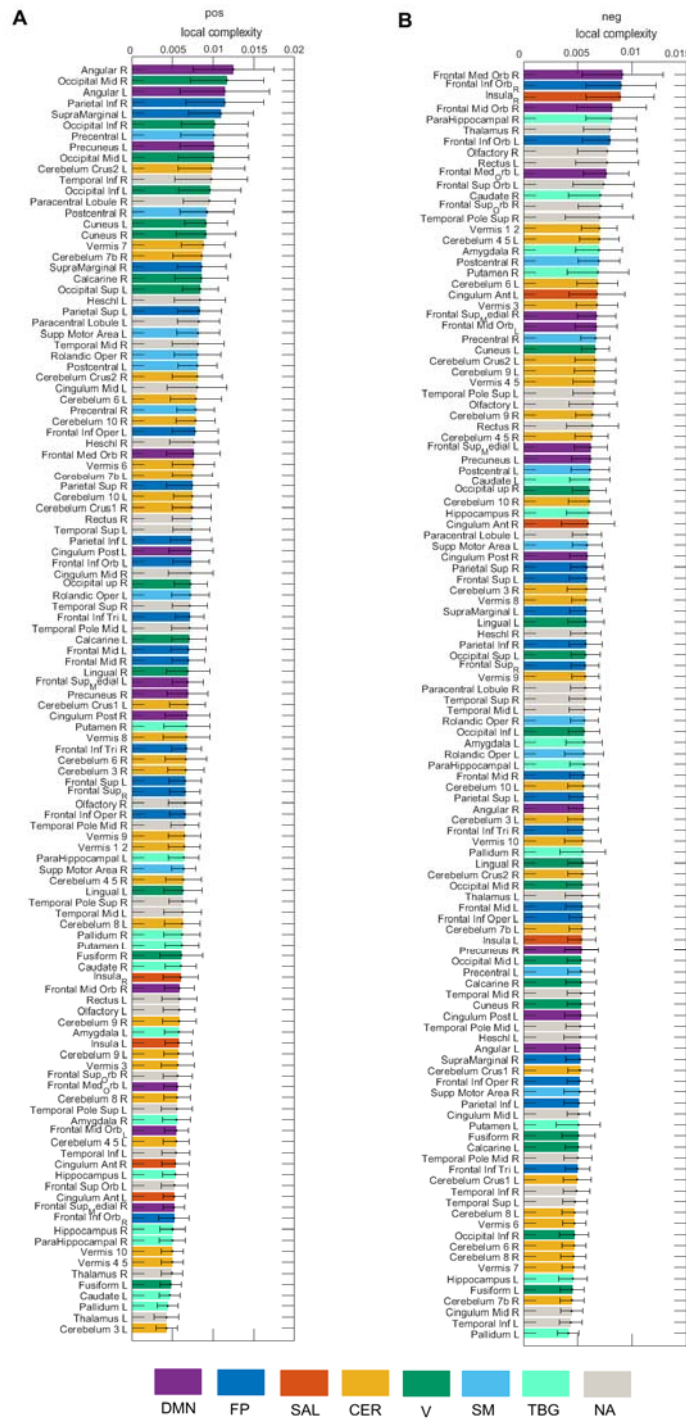

575

576 **Figure 7.** Local complexity of the 116 brain areas for the **pos** and **neg** cases. Seven resting-state  
 577 networks (see Supplementary Table 1) are represented through different colors: default mode  
 578 network (DMN), frontoparietal (FP), salience (SAL), sensorimotor (SM), visual (V), cerebellar  
 579 (CER), and temporo-basal-ganglial (TBG) networks. The gray color represents areas not  
 580 assigned (NA) to any of these networks.

581

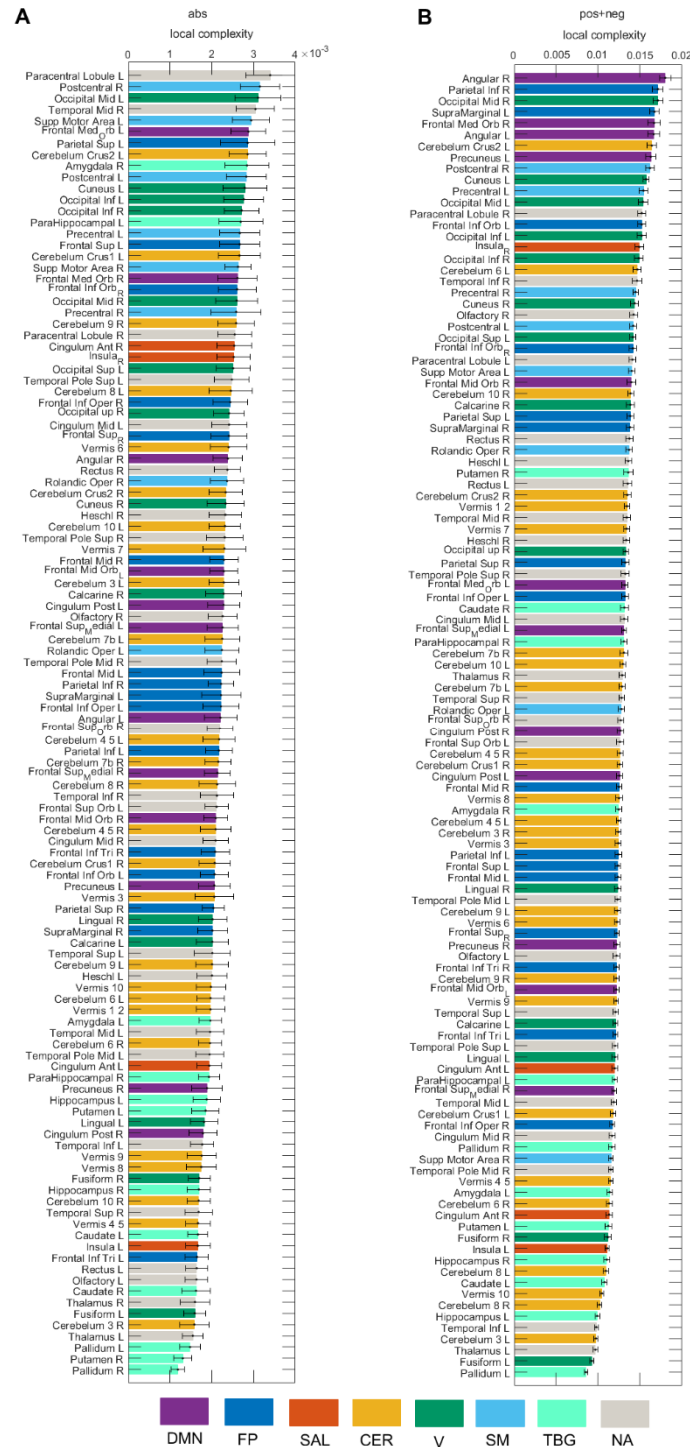

582

583 **Figure 8.** Local complexity of the 116 brain areas for the **abs** and **pos+neg** cases. Seven resting-  
 584 state networks (see Supplementary Table 1) are represented through different colors: default  
 585 mode network (DMN), frontoparietal (FP), salience (SAL), sensorimotor (SM), visual (V),  
 586 cerebellar (CER), and temporo-basal-ganglial (TBG) networks. The gray color represents areas  
 587 not assigned (NA) to any of these networks.

588

589

590

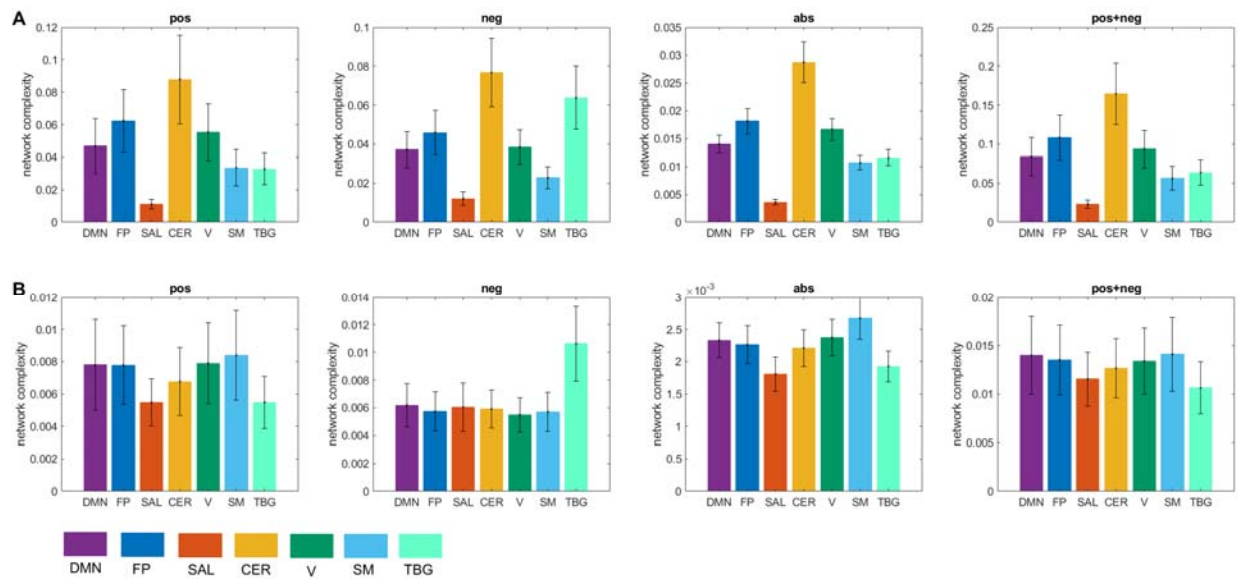

591

592 **Figure 9.** Network complexity. A) Global complexity of seven resting-state networks. B) Global  
593 complexity divided by the number of areas in each network. Seven resting-state networks (see  
594 Supplementary Table 1) are represented through different colors: default mode network (DMN),  
595 frontoparietal (FP), salience (SAL), sensorimotor (SM), visual (V), cerebellar (CER), and  
596 temporo-basal-ganglial (TBG) networks. The gray color represents areas not assigned (NA) to  
597 any of these networks.

598

599

600

601

602

603

604

605

606

607

608

609

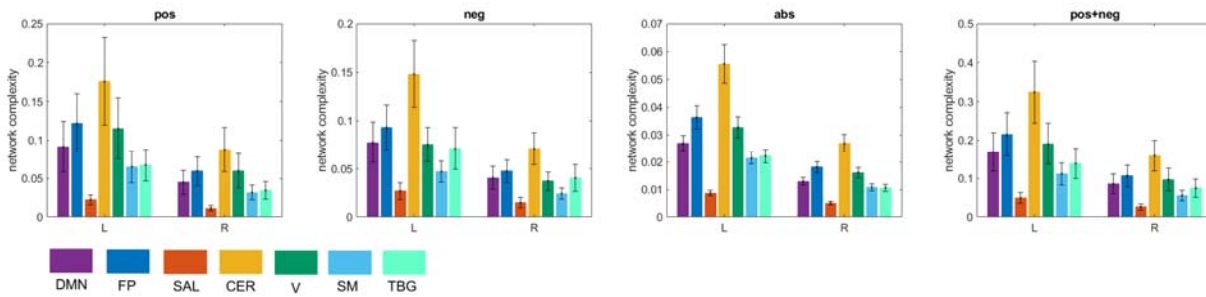

610

611 **Figure 10.** Interhemispheric asymmetry of global complexity. L- left hemisphere, R- right  
612 hemisphere. Seven resting-state networks (see Supplementary Table 1) are represented through  
613 different colors: default mode network (DMN), frontoparietal (FP), salience (SAL), sensorimotor  
614 (SM), visual (V), cerebellar (CER), and temporo-basal-ganglial (TBG) networks. The gray color  
615 represents areas not assigned (NA) to any of these networks.

616

617

618

619

620

621

622

623

624

625

626

627

628

629



630 **Supplementary Material**

631 Table S1. Resting-state networks

| <b>Network</b>               | <b>Areas</b>                                                                                                                                                                                                                                                                                                                                                                                                  |
|------------------------------|---------------------------------------------------------------------------------------------------------------------------------------------------------------------------------------------------------------------------------------------------------------------------------------------------------------------------------------------------------------------------------------------------------------|
| Default mode network (DMN)   | Frontal_Mid_Orb_L, Frontal_Mid_Orb_R<br>Frontal_Sup_Medial_L, Frontal_Sup_Medial_R<br>Frontal_Med_Orb_L, Frontal_Med_Orb_R<br>Cingulum_Post_L, Cingulum_Post_R<br>Angular_L, Angular_R<br>Precuneus_L, Precuneus_R                                                                                                                                                                                            |
| Frontoparietal (FP)          | Frontal_Sup_L, Frontal_Sup_R<br>Frontal_Mid_L, Frontal_Mid_R<br>Frontal_Inf_Oper_L, Frontal_Inf_Oper_R<br>Frontal_Inf_Tri_L, Frontal_Inf_Tri_R<br>Frontal_Inf_Orb_L, Frontal_Inf_Orb_R<br>Parietal_Sup_L, Parietal_Sup_R<br>Parietal_Inf_L, Parietal_Inf_R<br>SupraMarginal_L, SupraMarginal_R                                                                                                                |
| Saliency (SAL)               | Insula_L, Insula_R<br>Cingulum_Ant_L, Cingulum_Ant_R                                                                                                                                                                                                                                                                                                                                                          |
| Sensorimotor (SM)            | Precentral_L, Precentral_R<br>Rolandic_Oper_L, Rolandic_Oper_R<br>Postcentral_L, Postcentral_R<br>Supp_Motor_Area_L, Supp_Motor_Area_R                                                                                                                                                                                                                                                                        |
| Visual (V)                   | Calcarine_L, Calcarine_R<br>Cuneus_L, Cuneus_R<br>Lingual_L, Lingual_R<br>Occipital_Sup_L, Occipital_Sup_R<br>Occipital_Mid_L, Occipital_Mid_R<br>Occipital_Inf_L, Occipital_Inf_R<br>Fusiform_L, Fusiform_R                                                                                                                                                                                                  |
| Cerebellar (CER)             | Cerebelum_Crus1_L, Cerebelum_Crus1_R<br>Cerebelum_Crus2_L, Cerebelum_Crus2_R<br>Cerebelum_3_L, Cerebelum_3_R<br>Cerebelum_4_5_L, Cerebelum_4_5_R<br>Cerebelum_6_L, Cerebelum_6_R<br>Cerebelum_7b_L, Cerebelum_7b_R<br>Cerebelum_8_L, Cerebelum_8_R<br>Cerebelum_9_L, Cerebelum_9_R<br>Cerebelum_10_L, Cerebelum_10_R<br>Vermis_1_2, Vermis_3, Vermis_4_5, Vermis_6<br>Vermis_7, Vermis_8, Vermis_9, Vermis_10 |
| Temporo-basal-ganglial (TBG) | Hippocampus_L, Hippocampus_R<br>ParaHippocampal_L, ParaHippocampal_R<br>Amygdala_L, Amygdala_R,<br>Caudate_L, Caudate_R<br>Putamen_L, Putamen_R<br>Pallidum_L, Pallidum_R                                                                                                                                                                                                                                     |

632
